# Supplementary material for: Variability of Nutritional, Antioxidant, and Textural Traits of a Collection of Snap Beans of Different Colors
Source: MDPI journal article supplement (doi:10.3390/horticulturae9030311), 2023-02-27
Supplement: s1 [file s1]

**Table S1.** Mean values for the traits recorded in the different lines of the entire set of snap beans.

| Accessions | Group | PSW (mm)              | PC (%)         | Firmness (N)   | S (°Brix)      | L*             | a*       | b*             | B (100-L*)     |
|------------|-------|-----------------------|----------------|----------------|----------------|----------------|----------|----------------|----------------|
| SBP010     | I     | 6.81abcd <sup>l</sup> | 18.78 abc      | 17.76 abc      | 5.87 abcdef    | 41.77 efghi    | -7.69 ab | 20.33 abcd     | 58.23 abcd     |
| SBP016     | I     | 7.48abcd              | 20.17 abc      | <b>23.76 a</b> | 4.83 fghij     | 43.94 bcdefg   | -8.87 ab | 21.29 abcd     | 56.06 cdefgh   |
| SBP022     | II    | 7.87 abc              | 24.90 abc      | 12.16 abc      | 4.90 efghij    | 37.16 ghi      | -8.50 ab | 15.39 abcd     | 62.84 abc      |
| SBP035     | II    | 7.66 abcd             | 19.81 abc      | 10.17 abc      | 6.10 abcd      | 35.70 ghi      | -7.31 ab | 15.77 abcd     | 64.30 abc      |
| SBP036     | III   | 8.14 abc              | 20.45 abc      | <b>5.87 c</b>  | <b>6.40 a</b>  | 38.85 fghi     | -7.34 ab | 17.81 abcd     | 61.14 abcd     |
| SBP037     | IV    | 7.86 abc              | 20.44 abc      | 6.15 c         | 6.07 abcde     | 53.03 ab       | -7.90 ab | 19.98 abcd     | 46.97 hi       |
| SBP038     | IV    | 7.52 abcd             | 17.36 bc       | 10.43 abc      | 5.23 bcdefghij | <b>56.27 a</b> | -8.86 ab | 23.76 abc      | <b>43.73 i</b> |
| SBP039     | I     | 7.07 abcd             | 22.55 abc      | 22.65 ab       | 4.80 ghij      | 43.11 cdefgh   | -8.59 ab | 19.44 abcd     | 56.89 bcdefg   |
| SBP040     | I     | 7.38 abcd             | 20.49 abc      | 21.90 abc      | 4.37 j         | 40.07 fghi     | -8.60 ab | 20.25 abcd     | 59.93 abcd     |
| SBP042     | VII   | 6.99 abcd             | 25.13 abc      | 11.32 abc      | 5.17 cdefghij  | 37.33 ghi      | -6.34 ab | 12.20 d        | 62.66 abc      |
| SBP046     | II    | 7.39 abcd             | 21.43 abc      | 12.44 abc      | 4.90 fghij     | 38.68 fghi     | -7.73 ab | 16.56 abcd     | 61.32 abcd     |
| SBP049     | V     | 7.63 abcd             | 23.09 abc      | 10.87 abc      | 4.83 fghij     | 52.39 abc      | -8.40 ab | 18.63 abcd     | 47.61 ghi      |
| SBP053     | VI    | 6.42 abcd             | 20.10 abc      | 10.75 abc      | 6.37 a         | 39.55 fghi     | -7.64 ab | 17.77 abcd     | 60.45 abcd     |
| SBP059     | V     | 6.72 abcd             | 24.25 abc      | 9.17 abc       | 4.70 ghij      | 52.04 abcd     | -7.52 ab | 22.35 abcd     | 47.96 fghi     |
| SBP061     | II    | 5.42 bcd              | 21.47 abc      | 12.11 abc      | 4.55 ghij      | 36.74 ghi      | -7.65 ab | 13.34 bcd      | 63.25 abc      |
| SBP064     | II    | 7.72 abcd             | <b>16.82 c</b> | 8.92 abc       | 5.30 bcdefghij | 38.49 fghi     | -6.59 ab | 16.13 abcd     | 61.51 abcd     |
| SBP070     | I     | 5.75 bcd              | 22.67 abc      | 20.29 abc      | 5.70 abcdefg   | 48.02 abcdef   | -9.42 ab | 20.41 abcd     | 51.98 defghi   |
| SBP073     | III   | 7.17 abcd             | <b>26.59 a</b> | 14.13 abc      | 4.35 ij        | 42.60 bcdefghi | -7.52 ab | 17.25 abcd     | 57.39 abcdefgh |
| SBP082     | I     | 7.39 abcd             | 18.82 abc      | 17.17 abc      | 5.87 abcdef    | 42.66 cdefghi  | -9.79 b  | <b>25.80 a</b> | 57.33 abcdefg  |
| SBP085     | III   | 6.32 abcd             | 23.95 abc      | 17.43 abc      | 4.90 fghij     | 39.56 fghi     | -8.32 ab | 17.01 abcd     | 60.44 abcd     |
| SBP086     | IV    | 7.68 abcd             | 23.58 abc      | 9.54 abc       | 4.67 ghij      | 50.84 abcde    | -7.84 ab | 22.25 abcd     | 49.16 efghi    |
| SBP090     | IV    | 7.42 abcd             | 23.26 abc      | 18.26 abc      | 4.57 ij        | 54.46 a        | -7.00 ab | 24.52 ab       | 45.54 i        |
| SBP094     | IV    | 7.59 abcd             | 23.11 abc      | 13.20 abc      | 4.63 hij       | 52.49 abc      | -4.91 ab | 19.14 abcd     | 47.50 ghi      |
| SBP098     | IV    | 7.46 abcd             | 24.75 abc      | 18.23 abc      | <b>4.27 j</b>  | 55.14 a        | -7.77 ab | 23.85 abc      | 44.86 i        |
| SBP108     | I     | 7.10 abcd             | 19.93 abc      | 14.67 abc      | 4.80 ghij      | 41.37 efghi    | -9.01 ab | 19.72 abcd     | 58.63 abcd     |
| SBP112     | IV    | 6.76 abcd             | 26.17 ab       | 15.29 abc      | 4.43 ij        | 55.40 a        | -6.96 ab | 19.02 abcd     | 44.60 i        |
| SBP113     | II    | 8.20 ab               | 20.70 abc      | 9.79 abc       | 4.67 ghij      | 38.04 ghi      | -5.50 ab | 16.69 abcd     | 61.96 abc      |
| SBP114     | IV    | 6.86 abcd             | 23.64 abc      | 14.63 abc      | 4.35 j         | 54.29 a        | -6.93 ab | 17.10 abcd     | 45.71 i        |
| SBP115     | IV    | 7.68 abcd             | 19.20 abc      | 13.21 abc      | 4.80 ghij      | 53.30 ab       | -7.53 ab | 19.91 abcd     | 46.69 hi       |
| SBP116     | II    | 7.30 abcd             | 22.22 abc      | 9.39 abc       | 6.23 ab        | 41.40 efghi    | -9.52 ab | 21.19 abcd     | 58.60 abcd     |

|        |      |               |           |           |                |                |                |               |                |
|--------|------|---------------|-----------|-----------|----------------|----------------|----------------|---------------|----------------|
| SBP117 | IV   | 6.61 abcd     | 20.03 abc | 10.45 abc | 5.27 bcdefghij | 55.25 a        | <b>-4.36 a</b> | 14.52 bcd     | 44.74 i        |
| SBP120 | II   | 7.46 abcd     | 19.13 abc | 11.17 abc | 6.20 abc       | 35.28 ghi      | -7.42 ab       | 17.14 abcd    | 64.72 abc      |
| SBP121 | IV   | 6.83 abcd     | 21.67 abc | 9.77 abc  | 5.67 abcdefgh  | 55.67 a        | -7.89 ab       | 18.65 abcd    | 44.33 i        |
| SBP125 | IV   | 7.02 abcd     | 20.75 abc | 17.00 abc | 5.43 abcdefghi | 55.95 a        | -7.07 ab       | 17.80 abcd    | 44.05 i        |
| SBP137 | II   | <b>5.22 d</b> | 21.13 abc | 10.74 abc | 4.90 fghij     | 37.44 ghi      | -7.25 ab       | 14.83 abcd    | 62.56 abc      |
| SBP157 | II   | 6.62 abcd     | 22.76 abc | 7.64 bc   | 5.23 bcdefghij | 36.19 ghi      | -7.93 ab       | 15.27 abcd    | 63.81 abc      |
| SBP166 | VIII | 7.02 abcd     | 22.21 abc | 12.41 abc | 4.47 ij        | 40.01 fghi     | -7.16 ab       | 15.76 abcd    | 59.98 abcd     |
| SBP194 | III  | 6.68 abcd     | 18.66 abc | 8.95 abc  | 5.23 bcdefghij | 35.02 ghi      | -7.52 ab       | 15.79 abcd    | 64.98 abc      |
| SBP195 | III  | 7.70 abcd     | 18.52 abc | 12.67 abc | 5.10 defghij   | 38.14 ghi      | -7.64 ab       | 18.39 abcd    | 61.85 abc      |
| SBP227 | I    | 8.03 abc      | 18.11 abc | 18.25 abc | 5.63 abcdefgh  | 40.07 fghi     | -8.15 ab       | 17.59 abcd    | 59.93 abcd     |
| SBP240 | III  | 6.61abcd      | 21.34 abc | 11.97 abc | 5.10 bcdefghij | 37.33 ghi      | -7.55 ab       | 13.54 bcd     | 62.66 abc      |
| SBP242 | VIII | 7.81 abc      | 20.83 abc | 11.82 abc | 4.57 ij        | 38.58 fghi     | -6.82 ab       | 14.81 abcd    | 61.42 abcd     |
| SBP246 | II   | 7.77 abc      | 20.06 abc | 7.24 bc   | 4.73 ghij      | 38.19 fghi     | -7.30 ab       | 17.32 abcd    | 61.80 abcd     |
| SBP257 | II   | 6.89 abcd     | 21.75 abc | 11.49 abc | 4.80 ghij      | 35.50 ghi      | -6.97 ab       | 13.13 cd      | 64.50 abc      |
| SBP265 | V    | 6.91 abcd     | 24.43 abc | 16.82 abc | 4.37 j         | 55.57 a        | -7.62 ab       | 22.12 abcd    | 44.43 i        |
| SBP270 | IV   | 7.54 abcd     | 21.94 abc | 20.40 abc | 4.90 fghij     | 54.32 a        | -7.58 ab       | 20.27 abcd    | 45.67 i        |
| SBP271 | II   | 7.31 abcd     | 18.11 abc | 10.09 abc | 4.83 fghij     | 36.24 ghi      | -6.78 ab       | 13.92 bcd     | 63.76 abc      |
| SBP280 | I    | 7.13 abcd     | 22.30 abc | 19.94 abc | 4.90 fghij     | 40.71 fghi     | -8.46 ab       | 17.34 abcd    | 59.29 abcd     |
| SBP283 | I    | 5.66 cd       | 22.86 abc | 18.10 abc | 4.80 ghij      | 40.78 fghi     | <b>-9.82 b</b> | 19.12 abcd    | 59.22 abcd     |
| SBP287 | III  | 7.13 abcd     | 22.72 abc | 11.94 abc | 5.10 defghij   | 41.10 defghi   | -9.50 ab       | 20.45 abcd    | 58.90 abcdef   |
| SBP288 | II   | 7.15 abcd     | 21.96 abc | 13.74 abc | 4.70 ghij      | 40.58 efghi    | -8.44 ab       | 16.89 abcd    | 62.32 abcde    |
| SBP289 | III  | <b>9.02 a</b> | 21.39 abc | 6.15 c    | 4.65 ghij      | 39.87 efghi    | -7.82 ab       | 16.36 abcd    | 59.13 abcde    |
| SBP301 | II   | 6.65 abcd     | 24.72 abc | 10.81 abc | 4.60 ghij      | <b>31.95 i</b> | -5.71 ab       | 10.70 d       | <b>68.05 a</b> |
| SBP302 | II   | 5.42 bcd      | 22.72 abc | 9.15 abc  | 4.45 ij        | 32.56 hi       | -5.72 ab       | <b>9.96 d</b> | 67.44 ab       |
| P      |      | <.0001        | <.0001    | <.0001    | <.0001         | <.0001         | 0.0422         | <.0001        | <.0001         |

PSW, Pod Section Width (; S, Total Sugar Content (°Brix), PC, Protein Content (%), Firmness (N); values followed by different letters in the same column are significantly different (Tukey test,  $P < 0.05$ ); in **bold** the highest and lowest values
