# Supplementary material for: Variability of Nutritional, Antioxidant, and Textural Traits of a Collection of Snap Beans of Different Colors
Source: MDPI journal article supplement (doi:10.3390/horticulturae9030311), 2023-02-27
Supplement: s1 [file s1]

**Table S2.** Correlation coefficients between traits from the lines of the entire set of snap beans.

|                | PSW                   | PC                    | S                     | Firmness           | L                     | a                    | b                    | B |
|----------------|-----------------------|-----------------------|-----------------------|--------------------|-----------------------|----------------------|----------------------|---|
| PSW            | 1                     |                       |                       |                    |                       |                      |                      |   |
| PC             | -0.21 <sup>*</sup>    | 1                     |                       |                    |                       |                      |                      |   |
| S              | 0.05 <sup>n.s.</sup>  | -0.37 <sup>***</sup>  | 1                     |                    |                       |                      |                      |   |
| Firmness       | -0.18 <sup>n.s.</sup> | 0.15 <sup>n.s.</sup>  | -0.18 <sup>*</sup>    | 1                  |                       |                      |                      |   |
| L <sup>*</sup> | 0.09 <sup>n.s.</sup>  | 0.16 <sup>*</sup>     | -0.15 <sup>n.s.</sup> | 0.18 <sup>*</sup>  | 1                     |                      |                      |   |
| a <sup>*</sup> | 0.02 <sup>n.s.</sup>  | -0.02 <sup>n.s.</sup> | -0.07 <sup>n.s.</sup> | -0.20 <sup>*</sup> | -0.08 <sup>n.s.</sup> | 1                    |                      |   |
| b <sup>*</sup> | 0.11 <sup>n.s.</sup>  | -0.01 <sup>n.s.</sup> | -0.05 <sup>n.s.</sup> | 0.26 <sup>**</sup> | 0.50 <sup>***</sup>   | -0.42 <sup>***</sup> | 1                    |   |
| B              | -0.09 <sup>n.s.</sup> | -0.16 <sup>*</sup>    | 0.15 <sup>n.s.</sup>  | -0.18 <sup>*</sup> | -1 <sup>***</sup>     | 0.08 <sup>n.s.</sup> | -0.50 <sup>***</sup> | 1 |

n.s., not significant \*p< 0.05 \*\* p< 0.001 \*\*\*p< 0.0001
